# Supplementary material for: TIME to Change: An Evaluation of Practical Action Nepal’s Results Based Finance Program
Source: MDPI journal article supplement (doi:10.3390/en14102891), 2021-05-17
Supplement: s1 [file s1]

## Chapter S – Supplementary Information

Table S1: Reflection Sub-Factor

| Ranking | Phase 1                                                          | Phase 2                                                           |
|---------|------------------------------------------------------------------|-------------------------------------------------------------------|
| 1       | Project Mechanisms work as designed                              | High quality technology which works as is. described <sup>1</sup> |
| 2       | Users want ICS                                                   | Users are price orientated                                        |
| 3       | Users are price orientated                                       | Users take loans for ICS                                          |
| 4       | High quality technology which works as is described <sup>2</sup> | No education, results in no use                                   |
| 5       | Value chain is re-usable                                         | The new generation want new technology                            |
| 6       | Use depends on need                                              | Price to decrease as more people use ICS                          |
| 7       | No education, results in no use                                  | Project Mechanisms work as designed                               |
| 8       | The new generation want new technology                           | Warranty will be honoured                                         |
| 9       | There is no duplication of work                                  | Expectation of Quality Service                                    |
| 10      | ICS market is unpredictable                                      | Information dissemination process is slow                         |
| 10=     | BD are different in different geographies                        | -                                                                 |

Table S2: Government Perspective

|                              | Ownership                                               | Utilisation                                                                                                                                                                                 |                                                                            | Equality                                                                                                                                                            |
|------------------------------|---------------------------------------------------------|---------------------------------------------------------------------------------------------------------------------------------------------------------------------------------------------|----------------------------------------------------------------------------|---------------------------------------------------------------------------------------------------------------------------------------------------------------------|
|                              |                                                         | Human & Systems                                                                                                                                                                             | Material                                                                   |                                                                                                                                                                     |
| <b>Govt.</b>                 | Subsidy System<br>Local Govt. Promotion<br>Distribution | Aligning Projects with Policy Plan<br>Data Duplication<br>Communication (Previous Successes & failures, and what the subsidy is)<br>Local Govt. Networks (with Nat government and other KS) |                                                                            | Nat. Govt. Understanding Programs not working<br>No Funding at Local Govt. Level<br>Energy not a priority area<br>Stopping Migration<br>Data on Marginalised Groups |
| <b>NGO/Business</b>          | Demonstration/Distribution                              | Responsible for Installation<br>Utilising Local Govt. For Promotion                                                                                                                         | Promotion of other more convenient technologies<br>Knowledge of Technology | Target Marginalised Groups<br>International business taking over national market                                                                                    |
| <b>Co-ordinating Partner</b> |                                                         |                                                                                                                                                                                             |                                                                            | Stopping Data Duplication                                                                                                                                           |
| <b>Community</b>             | Promotion through<br>Community Groups                   |                                                                                                                                                                                             |                                                                            |                                                                                                                                                                     |

<sup>1</sup> P2 community members stated that although many ICS had been marketed as ‘smokeless’ this was not the case in their experience.

<sup>2</sup> See Footnote 1

|             |                                                    |  |                                                                       |                                                                       |
|-------------|----------------------------------------------------|--|-----------------------------------------------------------------------|-----------------------------------------------------------------------|
| <b>User</b> | Users need to inform themselves & buy technologies |  | Cost-Comparisons Be. Tech<br>Utilizing Available Fuels (Sawdust etc.) | Luxury-Seeking<br>Dependency on Financial Help<br>Financial Migration |
| OTHER       |                                                    |  |                                                                       |                                                                       |

Table S3: NGO/Business Perspective

|                              | Ownership                                                                                                                                                                    | Utilisation                                                                                                                                                                                                                                                                                                      |                                                                                                                                                                                                | Equality                                                                                                                                                                                                                           |
|------------------------------|------------------------------------------------------------------------------------------------------------------------------------------------------------------------------|------------------------------------------------------------------------------------------------------------------------------------------------------------------------------------------------------------------------------------------------------------------------------------------------------------------|------------------------------------------------------------------------------------------------------------------------------------------------------------------------------------------------|------------------------------------------------------------------------------------------------------------------------------------------------------------------------------------------------------------------------------------|
|                              |                                                                                                                                                                              | Human & Systems                                                                                                                                                                                                                                                                                                  | Material                                                                                                                                                                                       |                                                                                                                                                                                                                                    |
| <b>Govt.</b>                 | Subsidy System<br>Policy Priority (Induction?)<br>Energy Baseline Survey<br>Smokeless Kitchen<br>Regulation Barrier<br>Awareness Campaigns                                   | Centralisation to Federalised Govt. System<br>Govt. Tenders & Grants<br>Local Govt. Good Practice Guidelines                                                                                                                                                                                                     | LPG Import<br>Electrical Infrastructure                                                                                                                                                        | Subsidy System (Targeting lower castes)<br>Local Govt. Funding for Energy Projects<br>Policy Priority<br>Lack of co-ordinated response<br>Corruption                                                                               |
| <b>NGO/Business</b>          | Cookstove<br>Demonstration/Information dissemination<br>Awareness Campaigns (Radio, leaflets, gatherings)<br>Marketing: Wood = NEPAL, LPG = INDIA<br>Behavioural Change Data | M&E (KS feedback)<br>Employing (training) Local People for Manufacture and Maintenance<br>Market Competitiveness<br>Existing Value Chain (/project network)<br>Communication between KS<br>Using existing programs or technologies to help promote cookstove (lack of funding)<br>Govt. Consultation on Strategy | Importing Products<br>Using Local Materials<br>Quality of Products<br>Building ICS<br>Pellet Supply Chain<br>Lab/Field Differences in Performance<br>Correct MRP<br>Modification of Technology | Operational/Reputational Risk<br>Equal Access to Products – MFI Programs<br>Manufactures not able to go direct to customers (more cost to user)<br>Ineffective Communication<br>International business taking over national market |
| <b>Co-ordinating Partner</b> | Awareness Campaigns<br>Pressure on Results rather than impact<br>Effective Facilitation                                                                                      | M&E<br>Managing other KS<br>Facilitation between KS                                                                                                                                                                                                                                                              | Want to see Technology Development from PA                                                                                                                                                     | Incentive Distorting Market<br>Conflicting Projects                                                                                                                                                                                |
| <b>Community</b>             | Cookstove Demonstration<br>Influence Buying Behaviour<br>Forestry Group                                                                                                      | Value Chain                                                                                                                                                                                                                                                                                                      | Local Maintenance Hubs<br>Building/Assembly ICS                                                                                                                                                | Equal Access to Products – Co-Ops Programs<br>Distributors cost orientated                                                                                                                                                         |
| <b>User</b>                  | Communication between users (P2P marketing)<br>Habituate (/domesticate) Technology<br>User readiness<br>Buying ICS                                                           | No user and Manufacturer link – not feedback on willingness to pay                                                                                                                                                                                                                                               | Use of Wood as primary or secondary fuel source<br>Access to Electricity<br>Processing of Fuelwood<br>ICS Design Feedback<br>Technology Stacking                                               | Financial Incentives from Co-Ordinating Partner<br>Rural/Urban Divide in energy access<br>Dependency through Subsidy<br>User Choice<br>Inter-community divide<br>Different needs of men/women                                      |
| OTHER                        |                                                                                                                                                                              |                                                                                                                                                                                                                                                                                                                  |                                                                                                                                                                                                |                                                                                                                                                                                                                                    |

Table S4: Co-Ordinating Partner

|                              | Ownership                                                                                                              | Utilisation                                                    |                             | Equality                                                                  |
|------------------------------|------------------------------------------------------------------------------------------------------------------------|----------------------------------------------------------------|-----------------------------|---------------------------------------------------------------------------|
|                              |                                                                                                                        | Human & Systems                                                | Material                    |                                                                           |
| <b>Govt.</b>                 | Working Groups (Green & Inclusive Energy Program)<br>Delivering Policy (Basic Needs)                                   | Relationship bet Local & Nat Govt.<br>Impact of Federalisation |                             | Govt. not aware of Energy Needs<br>Duplication of Projects                |
| <b>NGO/Business</b>          | Manufactures focus on price<br>NGO focus on health<br>House to house visit program                                     | Managing Local Financial Institutions<br>M&E                   |                             | MFIs                                                                      |
| <b>Co-ordinating Partner</b> | Providing Incentives to Users, Co-Ops etc.<br>Radio Program, Leaflet, Posters and Banners<br>Needs to provide for free | Managing, Guiding, Providing Technical Support all the KS      | Identifying ICS for Program | Quality, Timely Delivery<br>Fraud/Corruption<br>Sustainable Exit Strategy |

|                  |                                                                                |                                                           |  |                          |
|------------------|--------------------------------------------------------------------------------|-----------------------------------------------------------|--|--------------------------|
| <b>Community</b> | Local Distributor/co-op marketing & demonstration<br>Marketing Agent Incentive | Mobilize Health Groups<br>Forestry group<br>Co-operatives |  | Giving access to Finance |
| <b>User</b>      |                                                                                | Social Pressure to Buy                                    |  |                          |
| OTHER            |                                                                                |                                                           |  |                          |

Co-ordinating partner – this KS had the only mention of the funding partner (EnDev) in all the interviews.

*Table S5: Community Perspective*

|                              | Ownership                                                                                                                                                                                                                                               | Utilisation                                                                                                      |                                      | Equality                                                                                                          |
|------------------------------|---------------------------------------------------------------------------------------------------------------------------------------------------------------------------------------------------------------------------------------------------------|------------------------------------------------------------------------------------------------------------------|--------------------------------------|-------------------------------------------------------------------------------------------------------------------|
|                              |                                                                                                                                                                                                                                                         | Human & Systems                                                                                                  | Material                             |                                                                                                                   |
| <b>Govt.</b>                 | Local Govt. ICS Distribution<br>National subsidy policy                                                                                                                                                                                                 | Collaborating with Local Distributors                                                                            |                                      | National Govt. not hearing energy needs<br>Disaster Relief & Response                                             |
| <b>NGO/Business</b>          | Local NGO organising events for demonstration<br>Social media marketing                                                                                                                                                                                 | NGO Managing local Stakeholders<br>Utilising Community and Govt. Networks                                        | Product Improvement through feedback | Effective communication with Community                                                                            |
| <b>Co-ordinating Partner</b> | Demonstration<br>Awareness by Social Media<br>Increasing Subsidy<br>Providing Incentive to Co-Op                                                                                                                                                        |                                                                                                                  |                                      | Providing Subsidy<br>Conflicting Programs & Distorting Markets                                                    |
| <b>Community</b>             | Distribution of ICS<br>Connecting Customers with Product<br>Spreading Awareness<br>Innovative Market Mechanisms<br>Social Media Marketing<br>Training on Correct Use<br>Local Distributors reaching remote markets<br>Co-Operative returning cookstoves | Utilising Community and Govt. Networks<br>Collaboration with Financial Co-Operative<br>M&E<br>Paperwork Mistakes | Warranty Implementation              | Giving ICS to Marginalised People (Post-Payment)<br>Reputational Risk<br>Providing Finance to Marginalised Groups |
| <b>User</b>                  | Using the ICS and tell peers of their experience<br>P2P Marketing<br>Seeing Luxury                                                                                                                                                                      | 3K npr Investment from 1000 co-op members for funds for program                                                  | Feedback to Manufactures             | Male/Female Divide the importance of ICS                                                                          |
| OTHER                        |                                                                                                                                                                                                                                                         |                                                                                                                  |                                      |                                                                                                                   |
